# Supplementary material
Source: PubMed Central journal article supplement (PMC5103001)
Supplement: mmc1.pdf [file mmc1.pdf]

**Biophysical Journal, Volume 111**

**Supplemental Information**

**Biochemical and Electrophysiological Modification of Amyloid Trans-  
thyretin on Cardiomyocytes**

**Laura Sartiani, Monica Bucciantini, Valentina Spinelli, Manuela Leri, Antonino Natalello, Daniele Nosi, Silvia Maria Doglia, Annalisa Relini, Amanda Penco, Sofia Giorgetti, Elisabetta Gerace, Guido Mannaioni, Vittorio Bellotti, Stefania Rigacci, Elisabetta Cerbai, and Massimo Stefani**

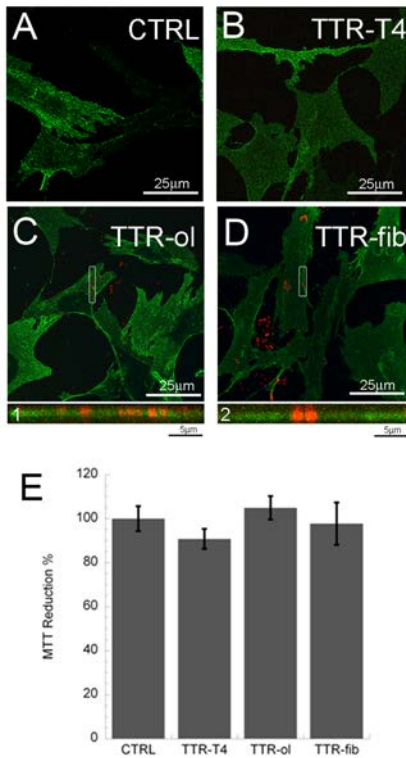

**FIGURE S1. Effect of TTR variants on HDF $\alpha$  human cells.** Confocal images of Human dermal fibroblast (HDF $\alpha$ ) exposed for 24 h to protein buffer (A), 10  $\mu$ M TTR-T4 (B), TTR-ol (C) and TTR-fib (D). The cells were stained with cholera toxin (green) and then were fixed, permeabilized and stained with anti-TTR antibody (red). 1,2: z-projection of the ROIs selected. E: Cytotoxic effect of TTR-T4, TTR-ol and TT-fib to HDF $\alpha$  cells performed by the MTT reduction assay. The values shown are normalized against the buffer control (n=3, mean  $\pm$ s.d.).

**Table S I: Cumulative calcium fractional variation relative to vehicle in HL-1 cardiomyocytes**

| <b>External solution (n)</b>          | <b>mean±s.e.m.</b>                       | <b>P value<br/>(Tukey's multiple comparisons test)</b> |
|---------------------------------------|------------------------------------------|--------------------------------------------------------|
| Veh (51) vs. TTT-ol (26)              | -9.1·10 <sup>-5</sup> ±2.0 vs. 42.9±3.8  | <0.001                                                 |
| Veh (51) vs. TTR-fib (17)             | -9.1·10 <sup>-5</sup> ±2.0 vs. 22.3±1.5  | <0.001                                                 |
| Veh (51) vs. TTR-ol 0Ca (16)          | -9.1·10 <sup>-5</sup> ±2.0 vs. 16.3±1.2  | <0.01                                                  |
| Veh (51) vs. TTR-fib 0Ca (41)         | -9.1·10 <sup>-5</sup> ±2.0 vs. 11.6±2.6  | <0.001                                                 |
| Veh (51) vs. TTR-T4 0Ca (42)          | -9.1·10 <sup>-5</sup> ±2.0 vs. -11.7±1.0 | <0.001                                                 |
| Veh (51) vs. TTR-ol Rya (14)          | -9.1·10 <sup>-5</sup> ±2.0 vs. 20.7±1.4  | <0.001                                                 |
| TTR (12) vs. TTR-ol (26)              | 2.5±1.8 vs. 42.9±3.8                     | <0.001                                                 |
| TTR (12) vs. TTR-fib (17)             | 2.5±1.8 vs. 22.3±1.5                     | <0.05                                                  |
| TTR-ol (26) vs. TTR-fib (17)          | 42.9±3.8 vs. 22.3±1.5                    | <0.001                                                 |
| TTR-ol (26) vs. TTR-T4 (33)           | 42.9±3.8 vs. 4.0±3.0                     | <0.001                                                 |
| TTR-ol (26) vs. TTR-ol 0Ca (16)       | 42.9±3.8 vs. 16.3±1.2                    | <0.001                                                 |
| TTR-ol (26) vs. TTR-fib 0Ca (41)      | 42.9±3.8 vs. 11.6±2.6                    | <0.001                                                 |
| TTR-ol (26) vs. TTR-T4 0Ca (42)       | 42.9±3.8 vs. -11.7±1.0                   | <0.001                                                 |
| TTR-ol (26) vs. TTR-ol Rya (14)       | 42.9±3.8 vs. 20.7±1.4                    | <0.001                                                 |
| TTR-ol (26) vs. TTR-ol 2APB (23)      | 42.9±3.8 vs. 6.2±0.4                     | <0.001                                                 |
| TTR-ol (26) vs. TTR-fib Rya (20)      | 42.9±3.8 vs. -0.8±2.7                    | <0.001                                                 |
| TTR-ol (26) vs. TTR-fib 2APB (18)     | 42.9±3.8 vs. 9.1±1.2                     | <0.001                                                 |
| TTR-ol (26) vs. TTR-T4 Rya (29)       | 42.9±3.8 vs. -7.4±1.5                    | <0.001                                                 |
| TTR-ol (26) vs. TTR-T4+2APB (33)      | 42.9±3.8 vs. -6.9±1.6                    | <0.001                                                 |
| TTR-fib (17) vs. TTR-T4 (33)          | 22.3±1.5 vs. 4.0±3.0                     | <0.01                                                  |
| TTR-fib (17) vs. TTR-T4 0Ca (42)      | 22.3±1.5 vs. -11.7±1.0                   | <0.001                                                 |
| TTR-fib (17) vs. TTR-ol 2APB (23)     | 22.3±1.5 vs. 6.2±0.4                     | <0.05                                                  |
| TTR-fib (17) vs. TTR-fib Rya (20)     | 22.3±1.5 vs. -0.8±2.7                    | <0.001                                                 |
| TTR-fib (17) vs. TTR-T4 Rya (29)      | 22.3±1.5 vs. -7.4±1.5                    | <0.001                                                 |
| TTR-fib (17) vs. TTR-T4 2APB (33)     | 22.3±1.5 vs. -6.9±1.6                    | <0.001                                                 |
| TTR-T4 (33) vs. TTR-T4 0Ca (42)       | 4.0±3.0 vs. -11.7±1.0                    | <0.001                                                 |
| TTR-T4 (33) vs. TTR-ol Rya (14)       | 4.0±3.0 vs. 20.7±1.4                     | <0.05                                                  |
| TTR-ol 0Ca (16) vs. TTR-T4 0Ca (42)   | 16.3±1.2 vs. -11.7±1.0                   | <0.001                                                 |
| TTR-ol 0Ca (16) vs. TTR-fib Rya (20)  | 16.3±1.2 vs. -0.8±2.7                    | <0.05                                                  |
| TTR-ol 0Ca (16) vs. TTR-T4 Rya (29)   | 16.3±1.2 vs. -7.4±1.5                    | <0.001                                                 |
| TTR-ol 0Ca (16) vs. TTR-T4 2APB (33)  | 16.3±1.2 vs. -6.9±1.6                    | <0.001                                                 |
| TTR-fib 0Ca (41) vs. TTR-T4 0Ca (42)  | 11.6±2.6 vs. -11.7±1.0                   | <0.001                                                 |
| TTR-fib 0Ca (41) vs. TTR-T4 Rya (29)  | 11.6±2.6 vs. -7.4±1.5                    | <0.001                                                 |
| TTR-fib 0Ca (41) vs. TTR-T4 2APB (33) | 11.6±2.6 vs. -6.9±1.6                    | <0.001                                                 |
| TTR-T4 0Ca (42) vs. TTR-ol Rya (14)   | -11.7±1.0 vs. 20.7±1.4                   | <0.001                                                 |
| TTR-T4 0Ca (42) vs. TTR-ol 2APB (23)  | -11.7±1.0 vs. 6.2±0.4                    | <0.001                                                 |
| TTR-T4 0Ca (42) vs. TTR-fib 2APB (18) | -11.7±1.0 vs. 9.1±1.2                    | <0.001                                                 |
| TTR-ol Rya (14) vs. TTR-fib Rya (20)  | 20.7±1.4 vs. -0.8±2.7                    | <0.01                                                  |
| TTR-ol Rya (14) vs. TTR-T4 Rya (29)   | 20.7±1.4 vs. -7.4±1.5                    | <0.001                                                 |
| TTR-ol Rya (14) vs. TTR-T4 2APB (33)  | 20.7±1.4 vs. -6.9±1.6                    | <0.001                                                 |
| TTR-ol 2APB (23) vs. TTR-T4 Rya (29)  | 6.2±0.4 vs. -7.4±1.5                     | <0.05                                                  |
| TTR-ol 2APB (23) vs. TTR-T4 2APB (33) | 6.2±0.4 vs. -6.9±1.6                     | <0.05                                                  |
| TTR-fib 2APB (18) vs. TTR-T4 Rya (29) | 9.1±1.2 vs. -7.4±1.5                     | <0.01                                                  |
| TTR-ol 2APB (23) vs. TTR-T4 2APB (33) | 6.2±0.4 vs. -6.9±1.6                     | <0.01                                                  |

**Table S II: Amplitude fractional variation of calcium transient relative to initial value in mice ventricular cardiomyocytes**

| External solution (n)/time (minute) | mean±s.e.m.                                                                                  | P value (Tukey's multiple comparisons test) |
|-------------------------------------|----------------------------------------------------------------------------------------------|---------------------------------------------|
| Veh (18)/0 vs. Veh (18)/5           | -0.012±0.012 vs. -8.59±2.90                                                                  | ns                                          |
| Veh (18)/0 vs. Veh (18)/10          | -0.012±0.012 vs. -36.09±4.27                                                                 | <0.001                                      |
| Veh (18)/0 vs. Veh (18)/15          | -0.012±0.012 vs. -49.85±4.29                                                                 | <0.001                                      |
| Veh(18)/0 vs. Veh (18)/20           | -0.012±0.012 vs. -60.62±4.19                                                                 | <0.001                                      |
| Veh (18)/0 vs. TTR-ol (14)/0        | -0.012±0.012 vs. $-1.33 \cdot 10^{-5} \pm 1.66 \cdot 10^{-5}$                                | ns                                          |
| Veh (18)/0 vs. TTR (13)/0           | -0.012±0.012 vs. $2.059 \cdot 10^{-5} \pm 4.038 \cdot 10^{-5}$                               | ns                                          |
| Veh (18)/0 vs. TTR-fib (19)/0       | -0.012±0.012 vs. $6.25 \cdot 10^{-4} \pm 4.93 \cdot 10^{-4}$                                 | ns                                          |
| Veh (18)/5 vs. Veh (18)/10          | -8.59±2.90 vs. -36.09±4.27                                                                   | <0.05                                       |
| Veh (18)/5 vs. Veh (18)/15          | -8.59±2.90 vs. -49.85±4.29                                                                   | <0.001                                      |
| Veh (18)/5 vs. Veh (18)/20          | -8.59±2.90 vs. -60.62±4.19                                                                   | <0.001                                      |
| Veh (18)/5 vs. TTR-fib (19)/5       | -8.59±2.90 vs. 18.39±5.64                                                                    | <0.05                                       |
| Veh (18)/10 vs. Veh (18)/15         | -36.09±4.27 vs. -49.85±4.29                                                                  | ns                                          |
| Veh (18)/10 vs. Veh (18)/20         | -36.09±4.27 vs. -60.62±4.19                                                                  | ns                                          |
| Veh (18)/10 vs. TTR-ol (14)/10      | -36.09±4.27 vs. -2.01±7.90                                                                   | <0.001                                      |
| Veh (18)/10 vs. TTR-fib (19)/10     | -36.09±4.27 vs. -9.82±7.87                                                                   | <0.05                                       |
| Veh (18)/15 vs. Veh (18)/20         | -49.85±4.29 vs. -60.62±4.19                                                                  | ns                                          |
| Veh (18)/15 vs. TTR-ol (14)/15      | -49.85±4.29 vs. -15.68±7.57                                                                  | <0.001                                      |
| Veh (18)/15 vs. TTR (13)/15         | -49.85±4.29 vs. -44.51±6.13                                                                  | ns                                          |
| Veh (18)/15 vs. TTR-fib (19)/15     | -49.85±4.29 vs. -30.47±26.14                                                                 | ns                                          |
| Veh (18)/20 vs. TTR-ol (14)/20      | -60.62±4.19 vs. -26.72±7.88                                                                  | <0.001                                      |
| Veh (18)/20 vs. TTR (13)/20         | -60.62±4.19 vs. -56.19±5.74                                                                  | ns                                          |
| Veh (18)/20 vs. TTR-fib (19)/20     | -60.62±4.19 vs. -46.49±7.83                                                                  | ns                                          |
| TTR-ol (14)/0 vs. TTR (13)/0        | $-1.33 \cdot 10^{-5} \pm 1.66 \cdot 10^{-5}$ vs. $2.06 \cdot 10^{-5} \pm 4.04 \cdot 10^{-5}$ | ns                                          |
| TTR-ol (14)/0 vs. TTR-fib (19)/0    | $-1.33 \cdot 10^{-5} \pm 1.66 \cdot 10^{-5}$ vs. $6.25 \cdot 10^{-4} \pm 4.93 \cdot 10^{-4}$ | ns                                          |
| TTR-ol (14)/5 vs. TTR (13)/5        | 54.47±10.30 vs. -18.50±4.85                                                                  | <0.001                                      |
| TTR-ol (14)/5 vs. TTR-fib (19)/5    | 54.47±10.30 vs. 18.39±5.64                                                                   | <0.001                                      |
| TTR-ol (14)/10 vs. TTR (13)/10      | -2.01±7.90 vs. 29.26±4.48                                                                    | ns                                          |
| TTR-ol (14)/10 vs. TTR-fib (19)/10  | -2.01±7.90 vs. -9.82±7.87                                                                    | ns                                          |
| TTR-ol (14)/15 vs. TTR (13)/15      | -15.68±7.57 vs. -44.51±6.13                                                                  | ns                                          |
| TTR-ol (14)/15 vs. TTR-fib (19)/15  | -15.68±7.57 vs. -30.47±26.14                                                                 | ns                                          |
| TTR-ol (14)/20 vs. TTR (13)/20      | -26.72±7.88 vs. -56.19±5.74                                                                  | ns                                          |
| TTR-ol (14)/20 vs. TTR-fib (19)/20  | -26.72±7.88 vs. -46.49±7.83                                                                  | ns                                          |
| TTR (13)/0 vs. TTR-fib (19)/0       | $2.06 \cdot 10^{-5} \pm 4.04 \cdot 10^{-5}$ vs. $6.25 \cdot 10^{-4} \pm 4.93 \cdot 10^{-4}$  | ns                                          |
| TTR (13)/5 vs. TTR-fib (19)/5       | -18.50±4.85 vs. 18.39±5.64                                                                   | <0.001                                      |
| TTR (13)/10 vs. TTR-fib (19)/10     | 29.26±4.48 vs. -9.82±7.87                                                                    | ns                                          |
| TTR (13)/15 vs. TTR-fib (19)/15     | -44.51±6.13 vs. -30.47±26.14                                                                 | ns                                          |
| TTR (13)/20 vs. TTR-fib (19)/20     | -56.19±5.74 vs. -46.49±7.83                                                                  | ns                                          |

**Table S III: Baseline fractional variation of calcium transient relative to initial value in mice ventricular cardiomyocytes**

| Time (min) | Vehicle (mean±s.e.m.) n=18 | TTR (mean±s.e.m.) n=13 | TTR-ol (mean±s.e.m.) n=14 | TTR-fib (mean±s.e.m.) n=19 |
|------------|----------------------------|------------------------|---------------------------|----------------------------|
|            |                            |                        |                           |                            |

|    |                |                                            |                                            |                                           |
|----|----------------|--------------------------------------------|--------------------------------------------|-------------------------------------------|
| 0  | -0.0075±0.0074 | $2.9 \cdot 10^{-10} \pm 7.5 \cdot 10^{-9}$ | $-1.4 \cdot 10^{-6} \pm 5.2 \cdot 10^{-6}$ | $9.6 \cdot 10^{-8} \pm 4.9 \cdot 10^{-4}$ |
| 5  | 3.1±0.6        | -1.5±0.7                                   | 1.2±1.5                                    | 3.0±5.6                                   |
| 10 | 0.2±1.7        | 1.4±0.7                                    | 0.078±0.33                                 | 6.7±7.9                                   |
| 15 | 13.0±5.4       | 3.2±1.6                                    | 13.0±7.4                                   | 5.0±26.1                                  |
| 20 | 23.2±6.4       | 16.1±3.0                                   | 19.4±9.9                                   | 10.6±7.8                                  |

**Table S IV: Time to peak fractional variation of calcium transient relative to initial value measured in mice ventricular cardiomyocytes**

| Time (min) | Vehicle (mean±s.e.m.)<br>n=18             | TTR (mean±s.e.m.)<br>n=13                 | TTR-ol (mean±s.e.m.)<br>n=14              | <b>TTR-fib (mean±s.e.m.)<br/>n=19</b>     |
|------------|-------------------------------------------|-------------------------------------------|-------------------------------------------|-------------------------------------------|
| 0          | $9.7 \cdot 10^{-7} \pm 1.2 \cdot 10^{-6}$ | $1.5 \cdot 10^{-6} \pm 1.5 \cdot 10^{-6}$ | $1.9 \cdot 10^{-7} \pm 1.1 \cdot 10^{-6}$ | $4.7 \cdot 10^{-7} \pm 9.6 \cdot 10^{-7}$ |
| 5          | 23.3±13.5                                 | 10.9±7.7                                  | 11.4±3.5                                  | 6.7±3.8                                   |
| 10         | 32.7±18.5                                 | 15.8±6.5                                  | 19.7±10.9                                 | 8.6±7.1                                   |
| 15         | 85.6±52.8                                 | 26.8±12.8                                 | 60.3±10.2                                 | 60.0±6.7                                  |
| 20         | 225.8±83.1                                | 189.2± 26.3                               | 166.3±16.7                                | 150.73±12.4                               |

**Table S V: 50% decay time fractional variation of calcium transient relative to initial value in mice ventricular cardiomyocytes**

| Time (min) | Vehicle (mean±s.e.m.)<br>n=18              | TTR (mean±s.e.m.)<br>n=13                 | TTR-ol (mean±s.e.m.)<br>n=14              | <b>TTR-fib (mean±s.e.m.)<br/>n=19</b>     |
|------------|--------------------------------------------|-------------------------------------------|-------------------------------------------|-------------------------------------------|
| 0          | $8.3 \cdot 10^{-7} \pm 1.03 \cdot 10^{-6}$ | $2.3 \cdot 10^{-7} \pm 4.0 \cdot 10^{-7}$ | $3.1 \cdot 10^{-8} \pm 3.3 \cdot 10^{-7}$ | $5.9 \cdot 10^{-7} \pm 3.3 \cdot 10^{-7}$ |
| 5          | 14.0±12.6                                  | -2.3±1.6                                  | -3.9±3.0                                  | 5.0±2.4                                   |
| 10         | 17.0±15.3                                  | -7.4±2.8                                  | 5.3±5.7                                   | 7.4±4.8                                   |
| 15         | 40.2±23.3                                  | 10.6±8.6                                  | 16.8±6.1                                  | 6.8±4.7                                   |
| 20         | 202.8±81.4                                 | 125.8± 35.1                               | 110.6±25.6                                | 100.4±24.6                                |
